# Supplementary material
Source: bioRxiv or medRxiv preprint supplement (https://www.biorxiv.org/highwire/filestream/72908/field_highwire_adjunct_files/0/238063-1.pdf)

# Supplementary Figure 1

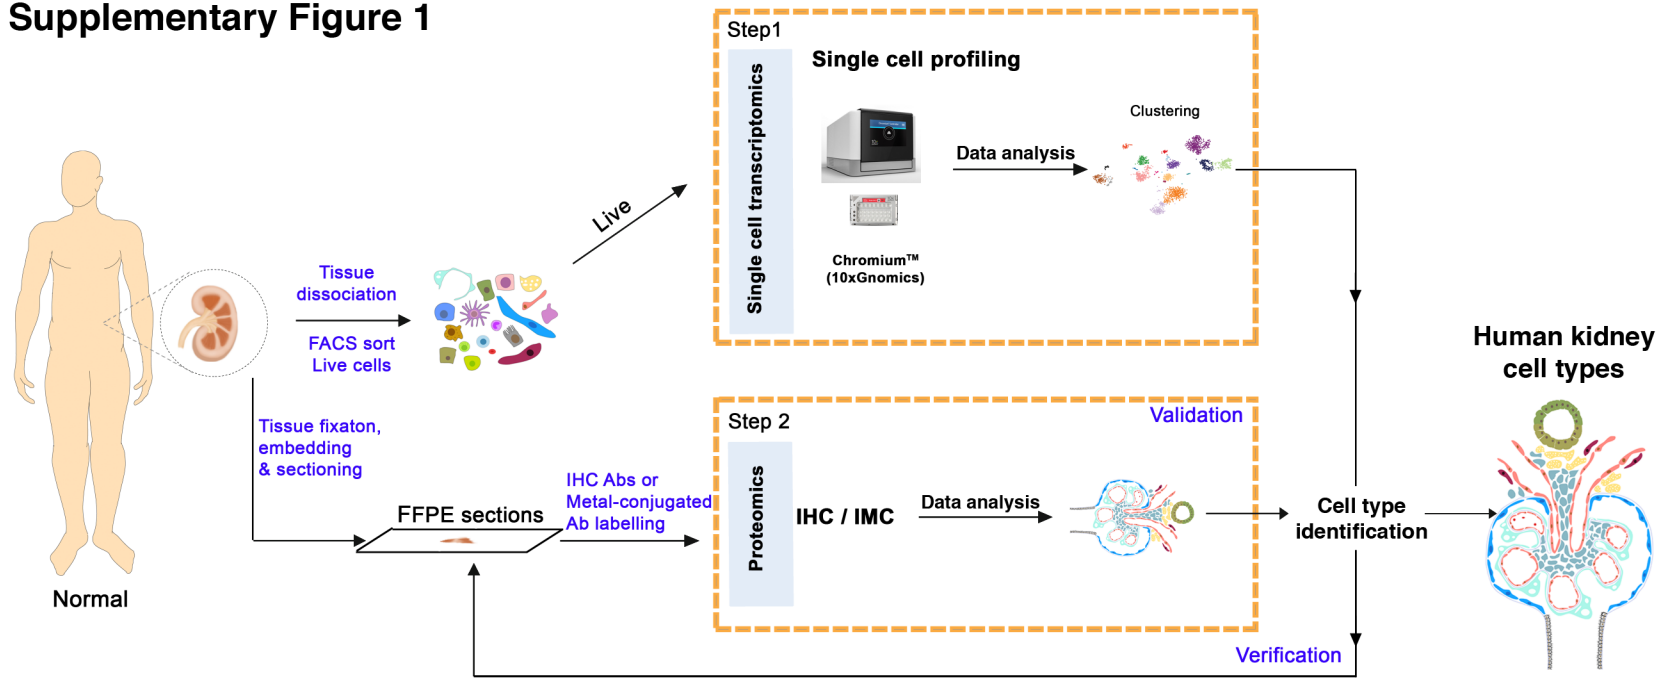

Supplementary Figure 2

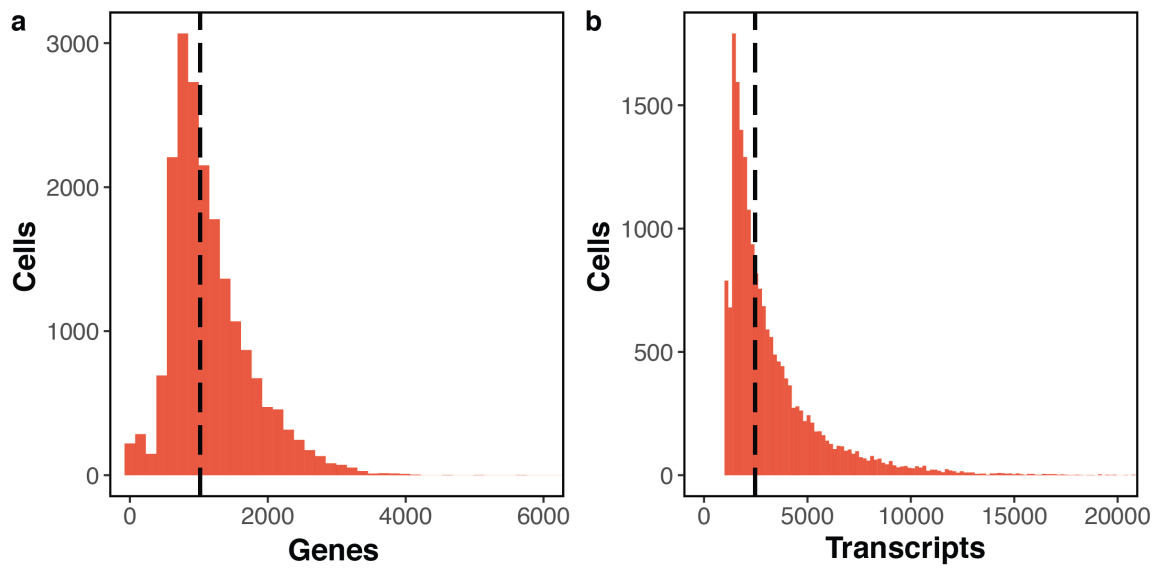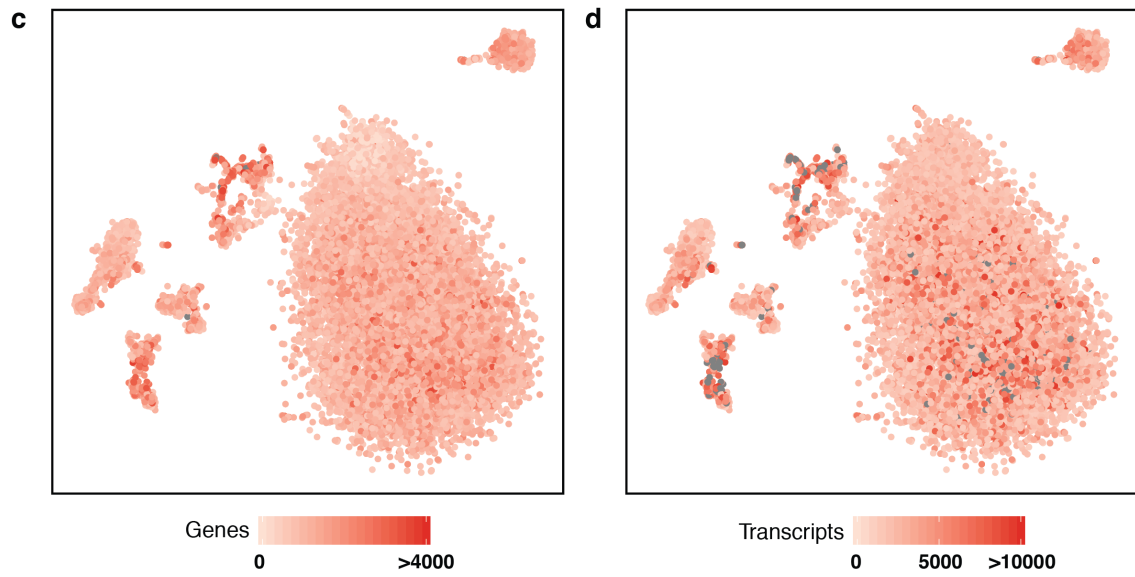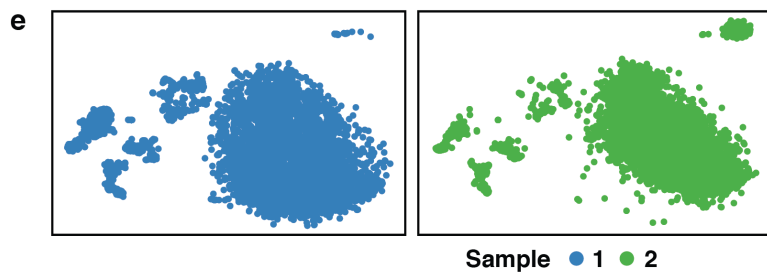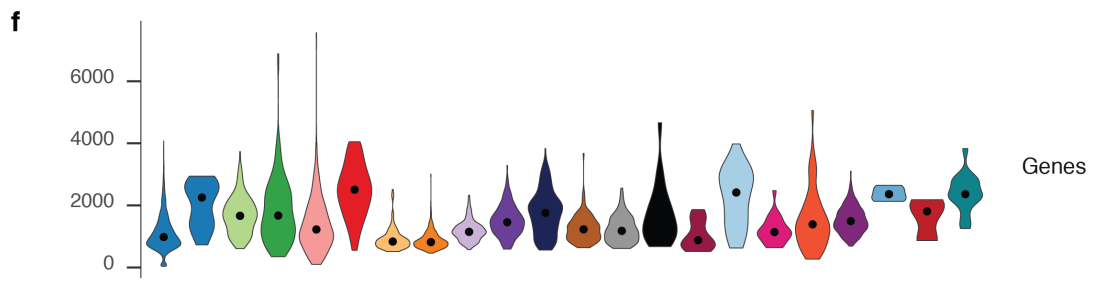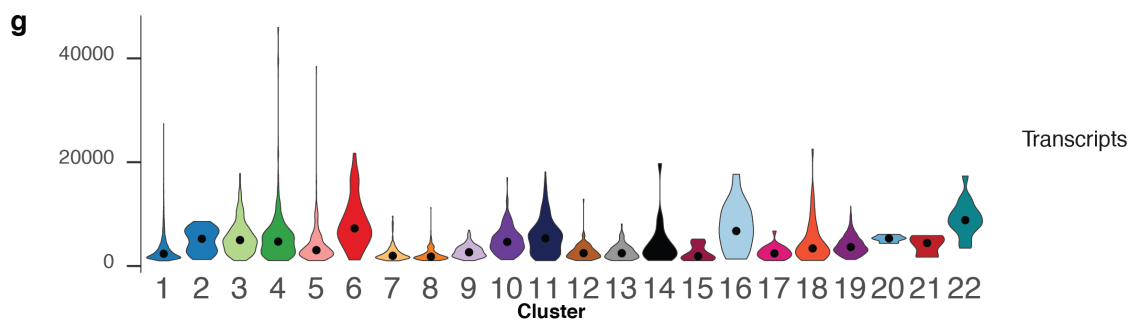

### Supplementary Figure 3

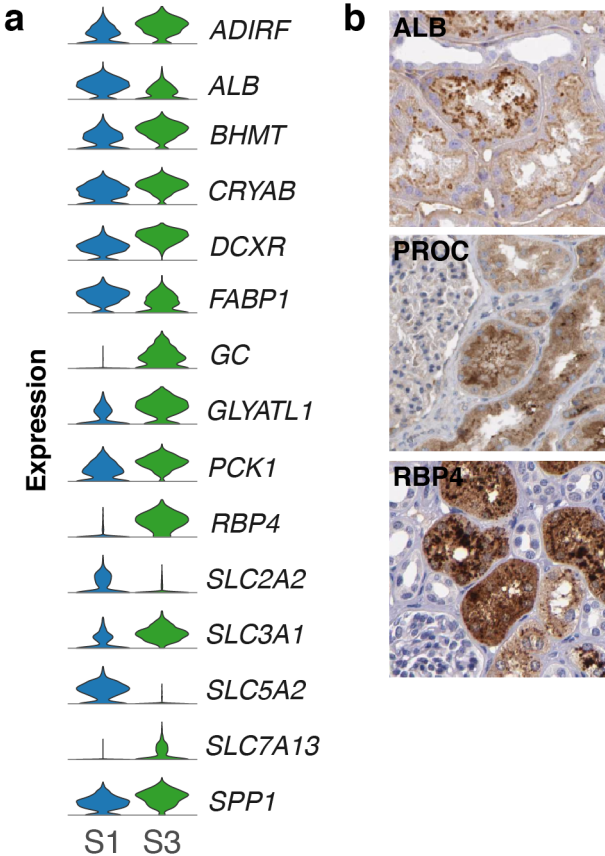

# Supplementary Figure 4

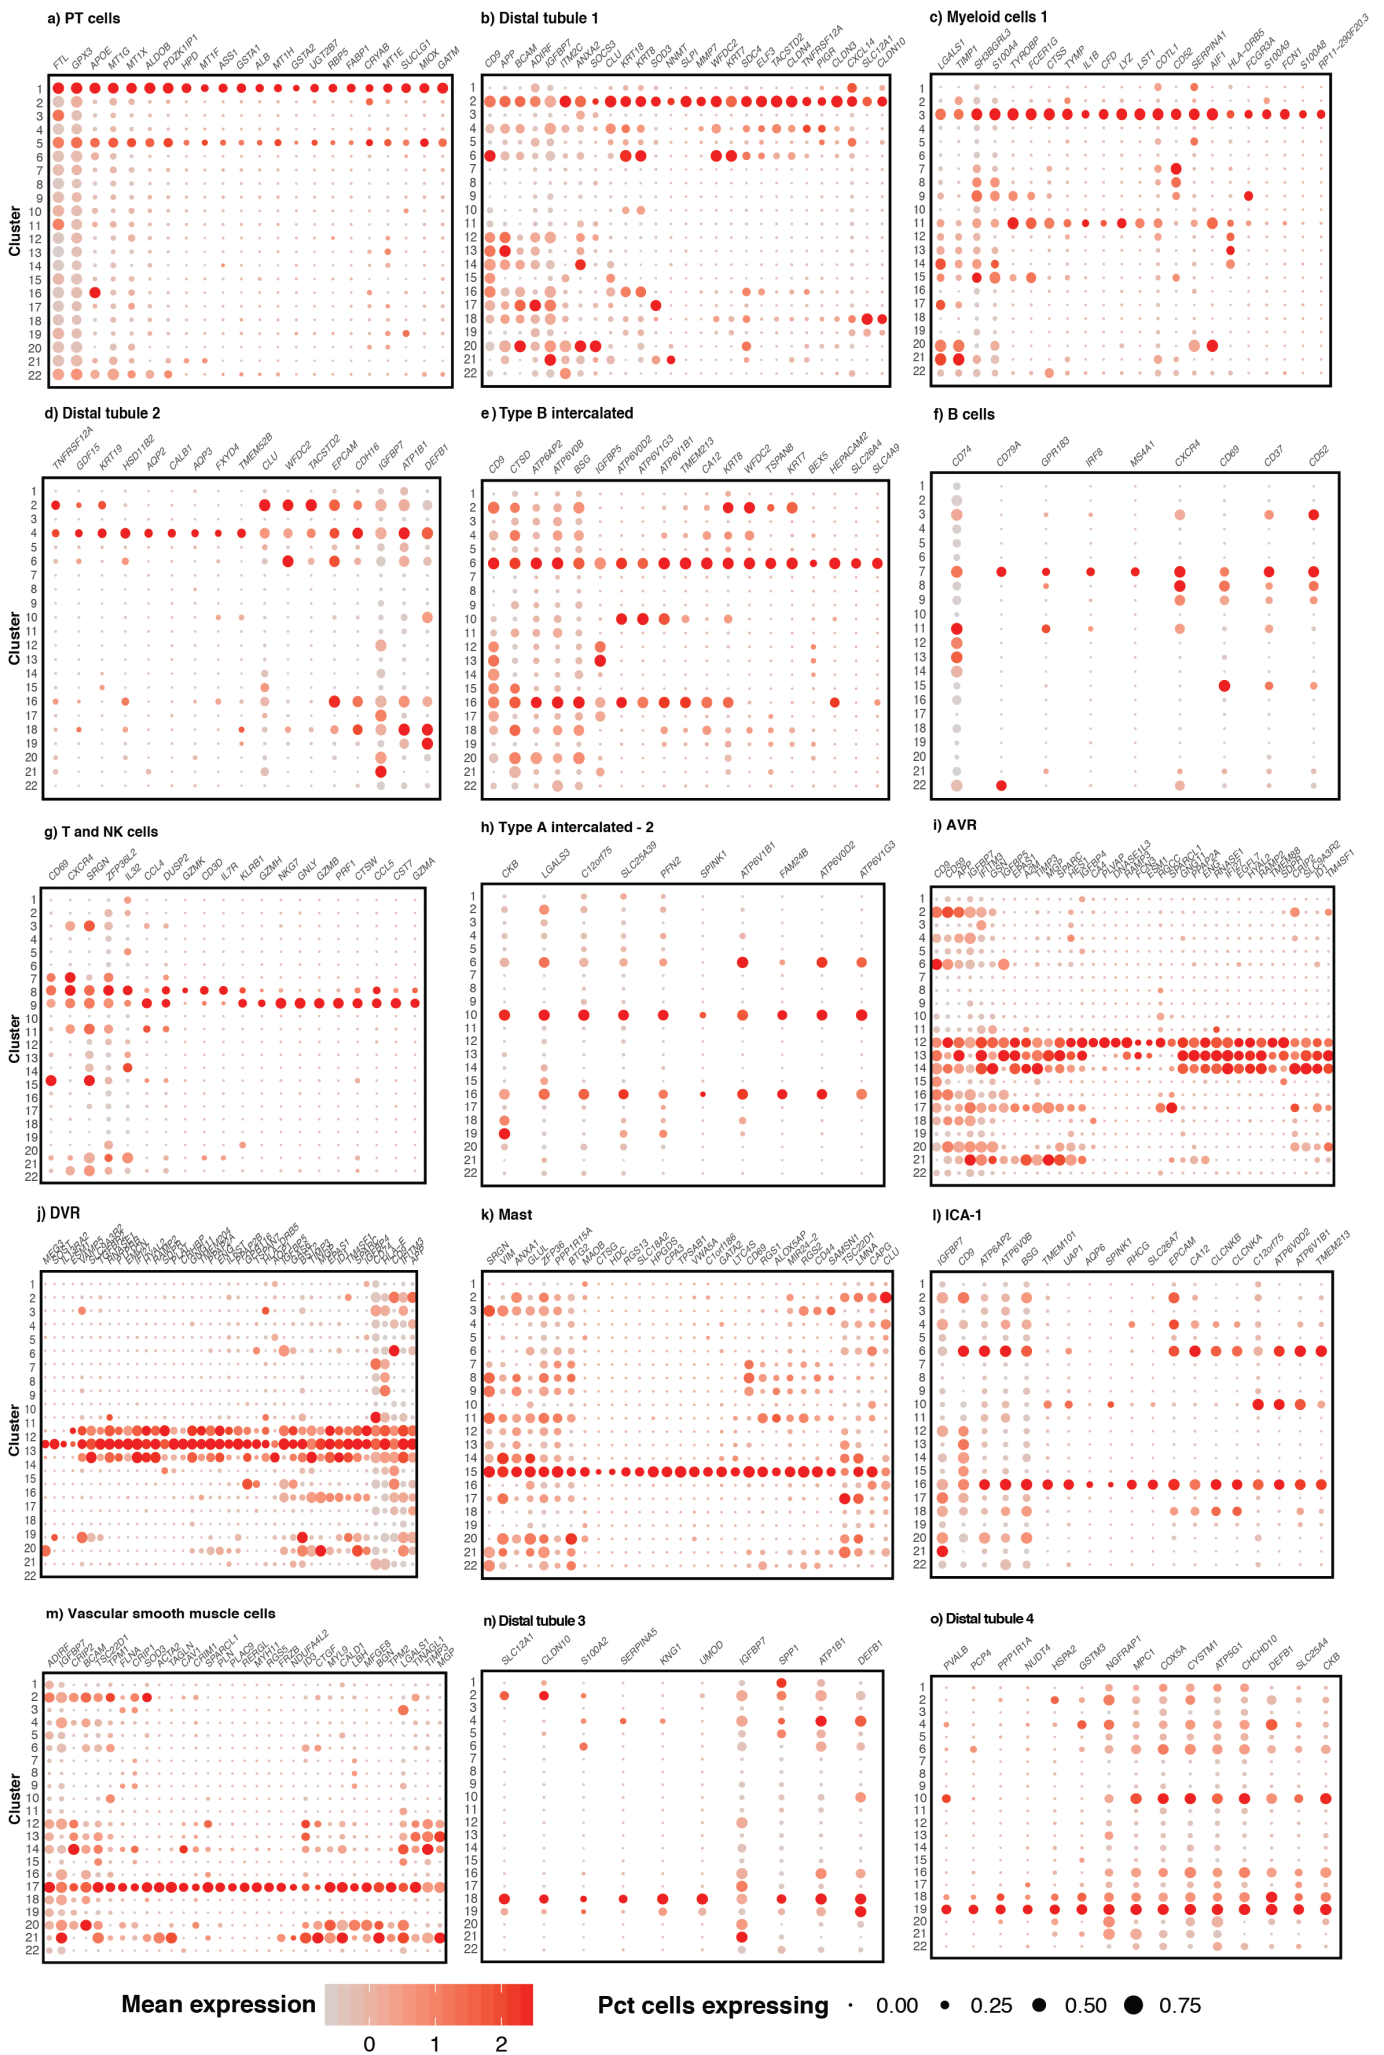







# Supplementary Figure 7

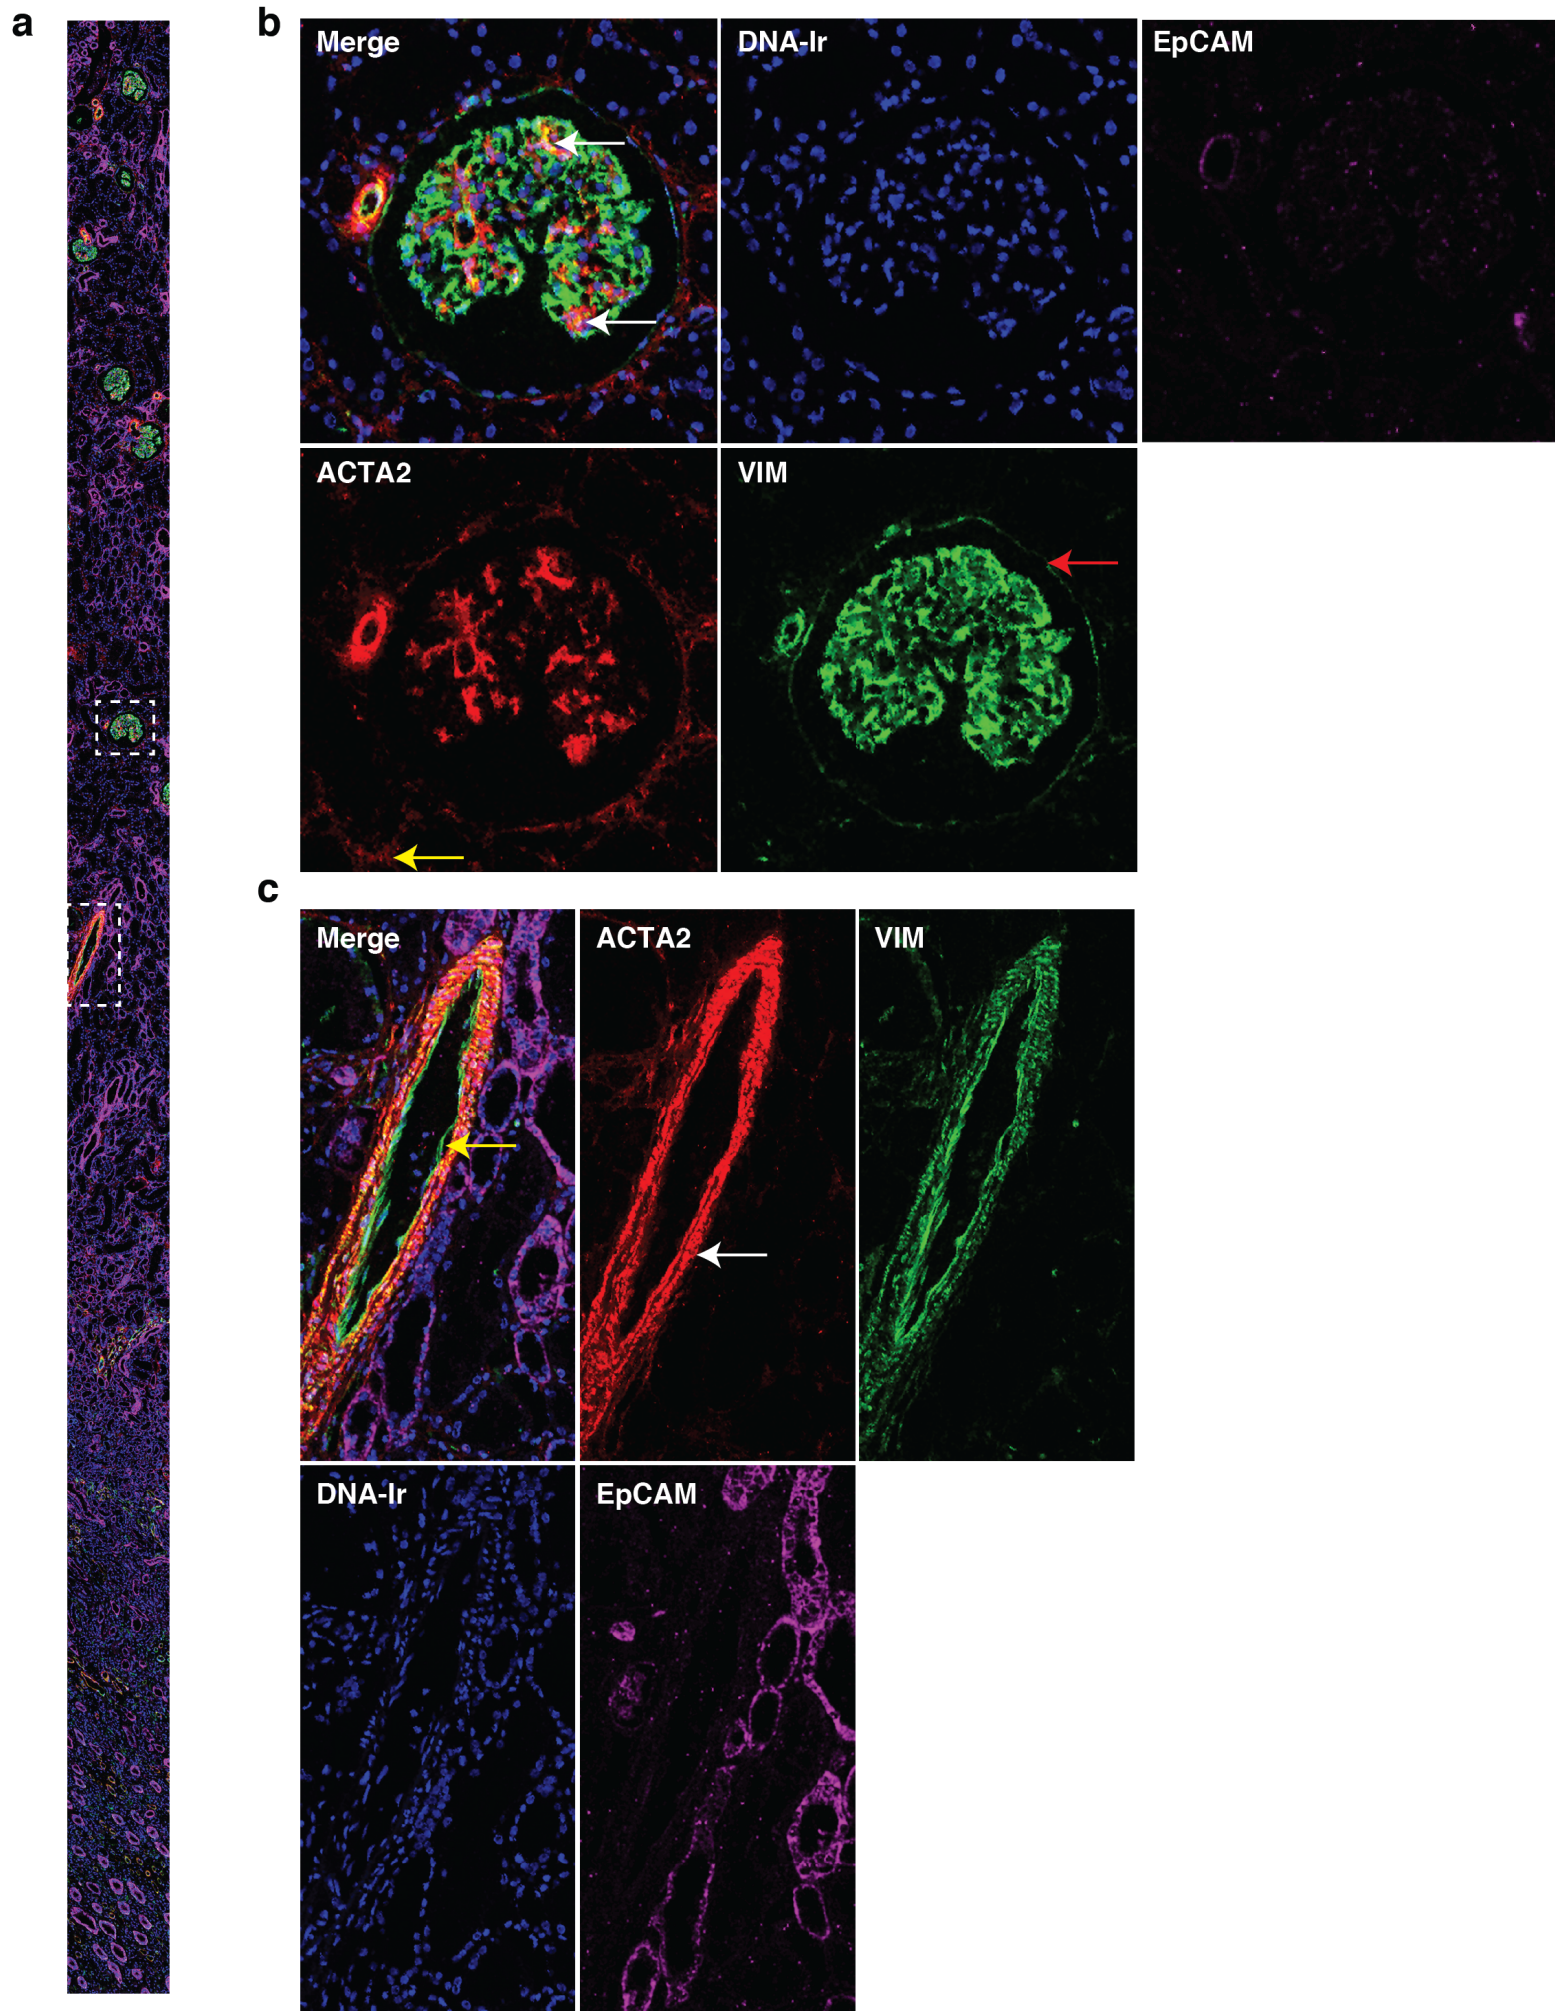



# Supplementary Figure 8

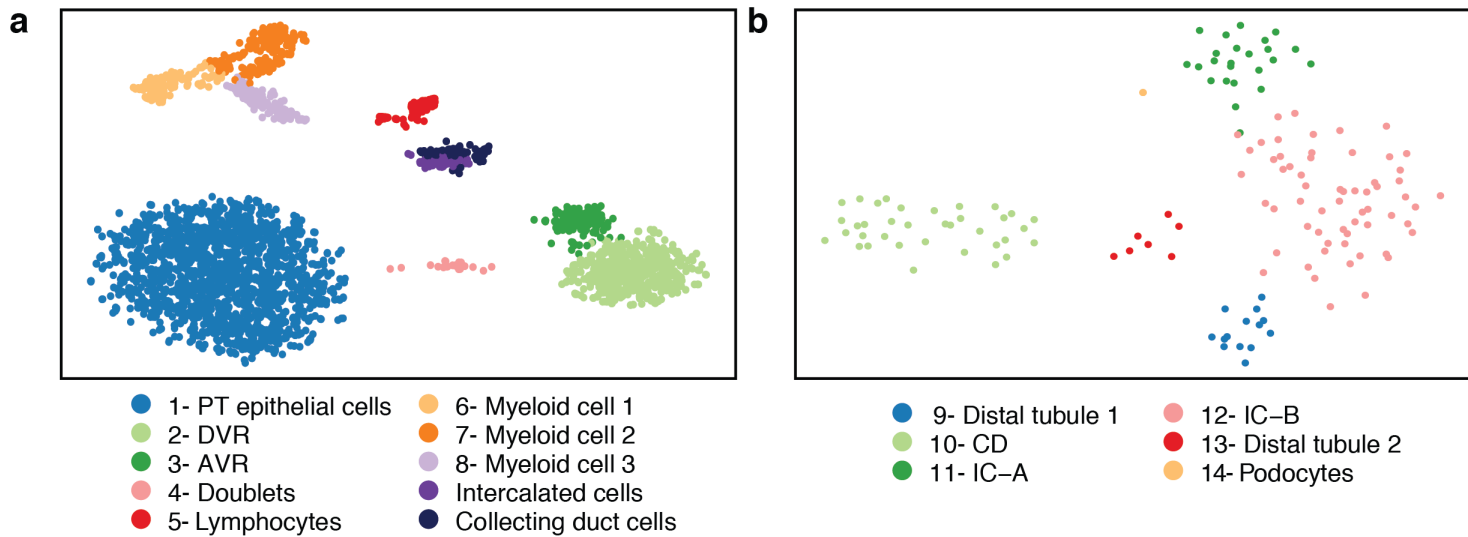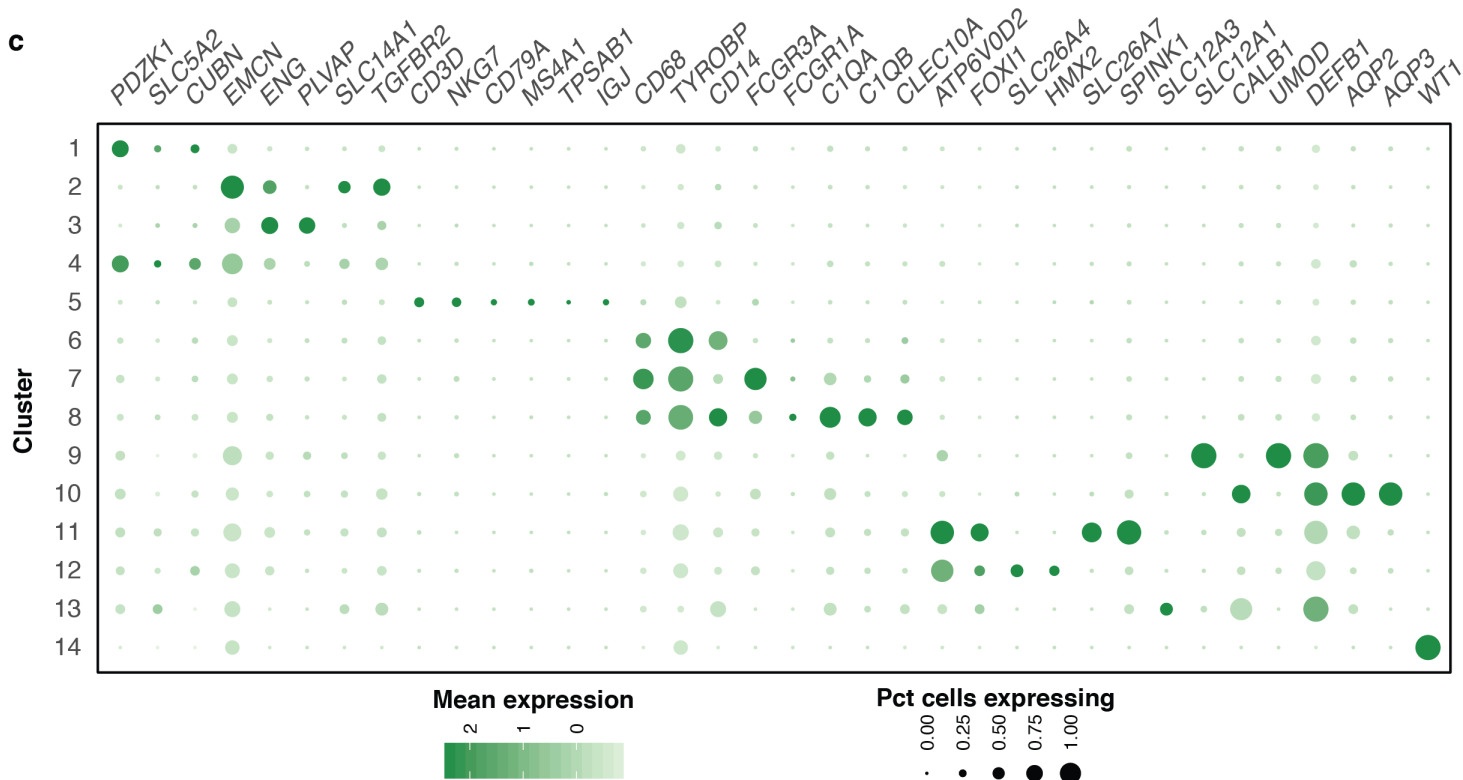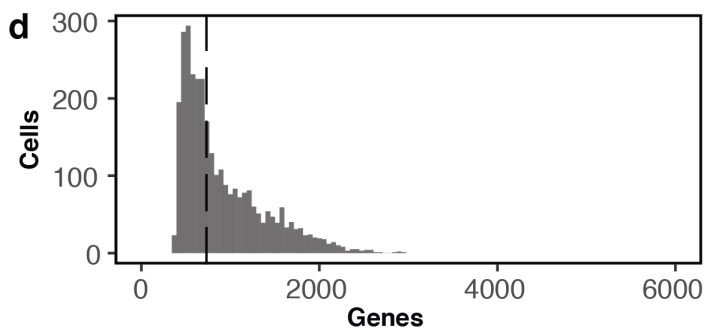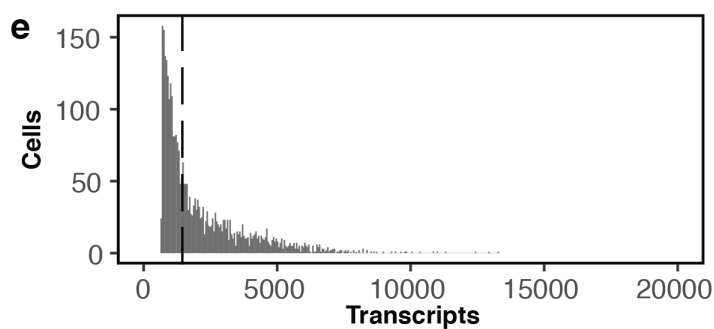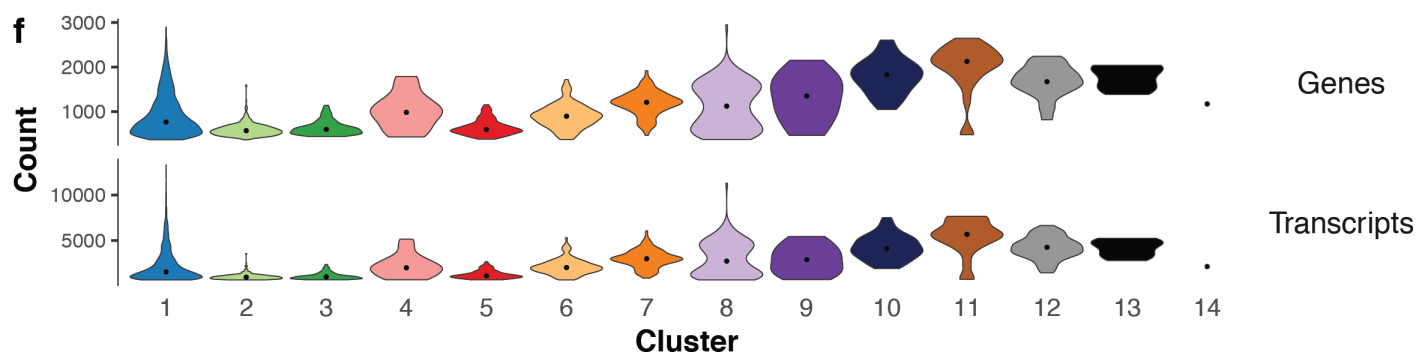

Supplement: Supplementary file [file 238063-1.pdf]
